# Supplementary material for: Maternal omega-3 fatty acid intake during neurodevelopment does not affect pup behavior related to depression, novelty, or learning
Source: BMC Res Notes. 2018 Nov 15;11:812. doi: 10.1186/s13104-018-3915-3 (PMC6238316; doi:10.1186/s13104-018-3915-3)
Supplement: Supplementary file 5 — Additional file 5. Table displaying results of linear mixed effects regression analysis of reference and working memory. [file 13104_2018_3915_MOESM5_ESM.xlsx]

## Sheet: Sheet1
Additional File 5. Linear mixed effects regression analysis of reference and working memory.
Hole board memory ratio	Mean ± SEM		Mean Difference in Change	95% CI of Mean Difference	F (1,15)	P-value
Effect of Maternal Diet	Deficient	Supplemented
Reference memory ratio	0.65 ± 0.03	0.72 ± 0.06	0.06	-0.07, 0.20	1.21	0.29
Working memory ratioa	0.60 ± 0.04	0.61 ± 0.06	0.01	-0.14, 0.16	0.01	0.92
Effect of Day	Day 1	Day 3
Reference memory ratio	0.59 ± 0.05	0.81 ± 0.04	0.22	0.10, 0.35	7.37	0.003*
Working memory ratioa	0.57 ± 0.05	0.71 ± 0.05	0.14	0.03, 0.25	3.76	0.04*
Maternal Diet x Day Interaction
Reference memory ratio					0.2	0.82
Working memory ratioa					0.27	0.77
*Significantly different P < 0.05
a. Data shown for working memory ratio are the mean ± SEM of n = 10 deficient and n = 6 supplemented pups, F (1,14).
